# Supplementary material for: A spatiotemporal release hydrogel based on an M1-to-M2 immunoenvironment for wound management
Source: Royal Society of Chemistry journal article supplement (doi:10.1039/d3tb00463e), 2023-01-01
Supplement: d3tb00463e1.pdf [file d3tb00463e1.pdf]

## Supplementary Information

### A spatiotemporal release hydrogel based on M1-to-M2 immunoenvironment in wound management

Huimin Xiao, Xin Chen, Jianyang Shan, Xuanzhe Liu, Yi Sun, Junjie Shen, Yimin Chai, Gen Wen, Yaling Yu

**Table S1. The gene-specific primer sequences.**

| Gene name    | Direction | Primer sequence (5'-3')      |
|--------------|-----------|------------------------------|
| GAPDH        | Forward   | CCTCGTCCCGTAGACAAAATG        |
|              | Reverse   | TGAGGTCAATGAAGGGGTCGT        |
| iNOS         | Forward   | CTGCTGGTGGTGACAAGCACATTT     |
|              | Reverse   | ATGTCATGAGCAAAGGCGCAGAA<br>C |
| Arg1         | Forward   | CAAGGTGGCAGAAGTCAAGAA        |
|              | Reverse   | GCTTCCAATTGCCAAACTGTG        |
| TGF- $\beta$ | Forward   | CCACCTGCAAGACCATCGAC         |
|              | Reverse   | CTGGCGAGCCTTAGTTTGGAC        |
| IL-10        | Forward   | CTTACTGACTGGCATGAGGATCA      |
|              | Reverse   | GCAGCTCTAGGAGCATGTGG         |
| IL-1Ra       | Forward   | TCTATGATGCAAGCTATGGCTCA      |
|              | Reverse   | CGGCTCTCCTTGAAGGTGA          |
| TNF-a        | Forward   | CAGGCGGTGCCTATGTCTC          |
|              | Reverse   | CGATCACCCCGAAGTTCAGTAG       |
| IL-6         | Forward   | CTGCAAGAGACTTCCATCCAG        |
|              | Reverse   | AGTGGTATAGACAGGTCTGTTGG      |
| IL-12        | Forward   | GTCCTCAGAAGCTAACCATCTCC      |
|              | Reverse   | CCAGAGCCTATGACTCCATGTC       |
| CCL5         | Forward   | TTTGCCTACCTCTCCCTCG          |
|              | Reverse   | CGACTGCAAGATTGGAGCACT        |
| CCL17        | Forward   | TACCATGAGGTCACTTCAGATGC      |
|              | Reverse   | GCACTCTCGGCTACATTGG          |
| CCL1         | Forward   | TGCCGTGTGGATACAGGATG         |
|              | Reverse   | GTTGAGGCGCAGCTTTCTCTA        |
| CCL22        | Forward   | CTACAGACTGCACTCCTGGTTGTC     |
|              | Reverse   | GGGCTGCCTCAGTTGCT            |
| VEGFA        | Forward   | GTAACGATGAAGCCCTGGAGTG       |
|              | Reverse   | TCACAGTGAACGCTCCAGGAT        |
| PDGF         | Forward   | CCAGGACGGTCATTTACGAGA        |

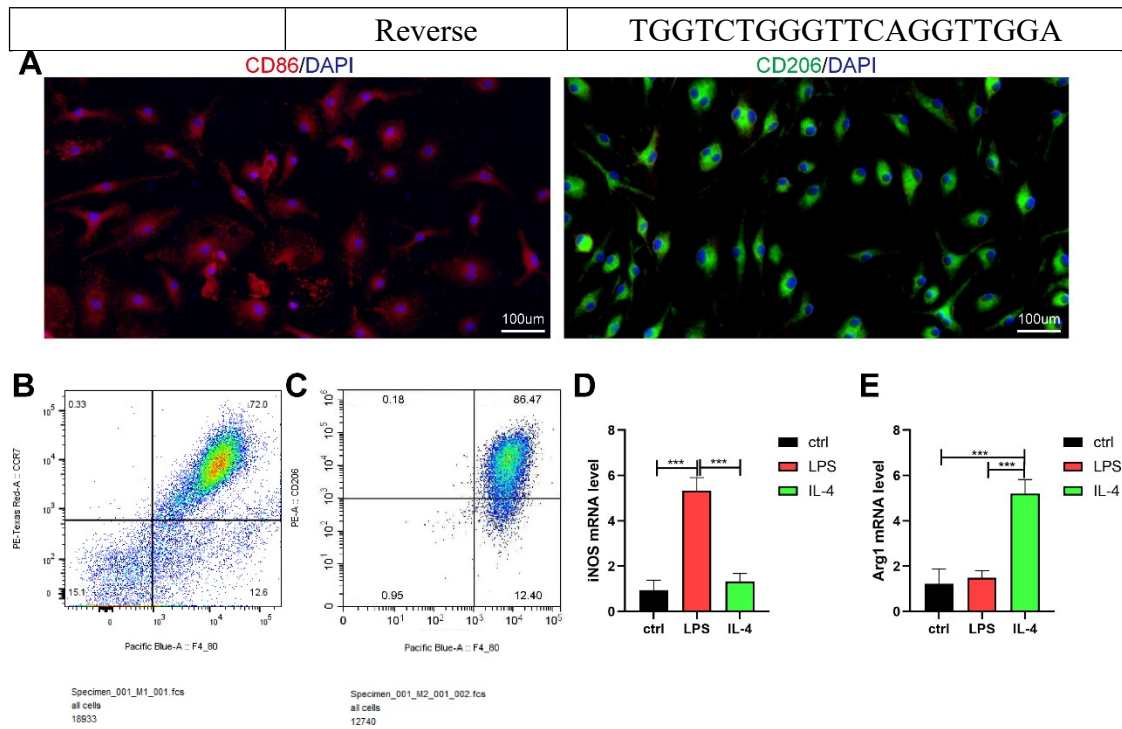

**Figure S1. Macrophage polarization.** (A) The morphology of polarized macrophages and fluorescence immunolabeling results for an M1 marker (CD86) and M2 marker (CD206). (B-C) Flow cytometric analysis of macrophage population within polarized macrophages. (D-E) Real-time PCR analysis of markers of M1 (iNOS) and M2 (Arg1) macrophage polarization.

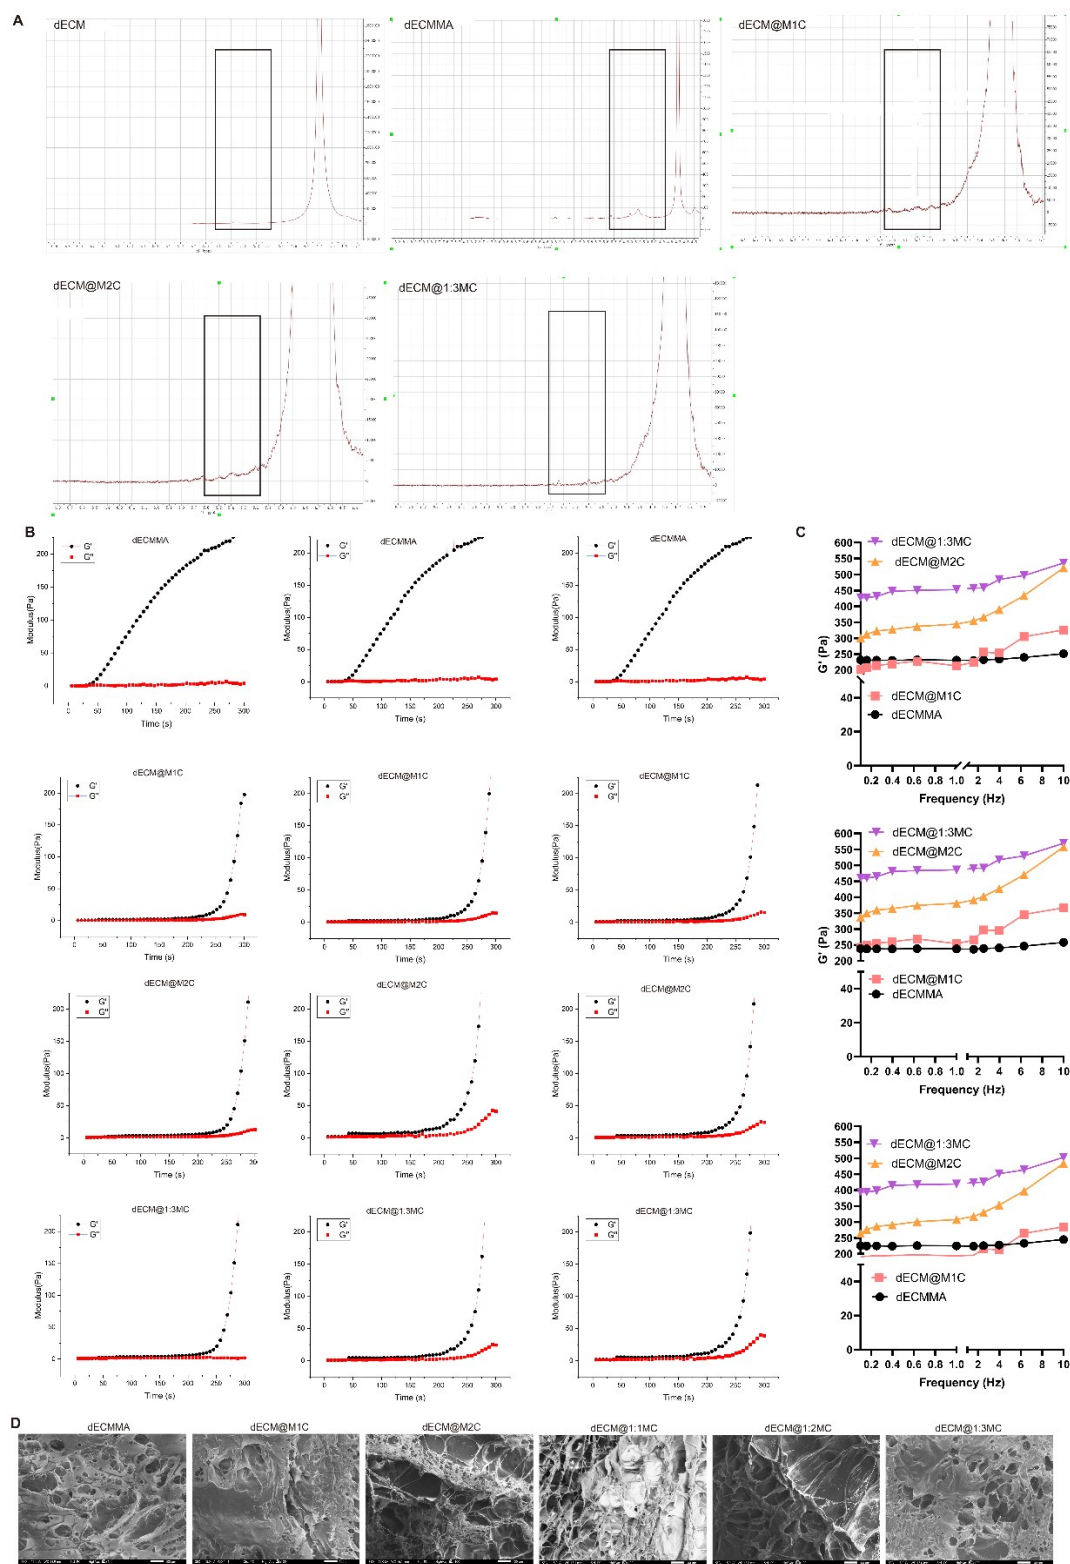

**Figure S2. Hydrogel characterizations.** (A)  $^1\text{H}$  NMR measurement. (B) Frequency-sweep assessment of storage modulus ( $G'$ ) and loss modulus ( $G''$ ) of dECMMA, dECM@M1C, dECM@M2C and dECM@1.3MC hydrogels.  $n = 3$ . (C) Frequency-sweep assessment of storage modulus ( $G'$ ) of dECM@M1C, dECM@M2C and

dECMA@1:3MC hydrogels. n = 3. (D) SEM images of dECMMA, dECM@M1C, dECM@M2C and dECM@1:3MC hydrogels. n = 5. Scale bars, 100  $\mu$ m.

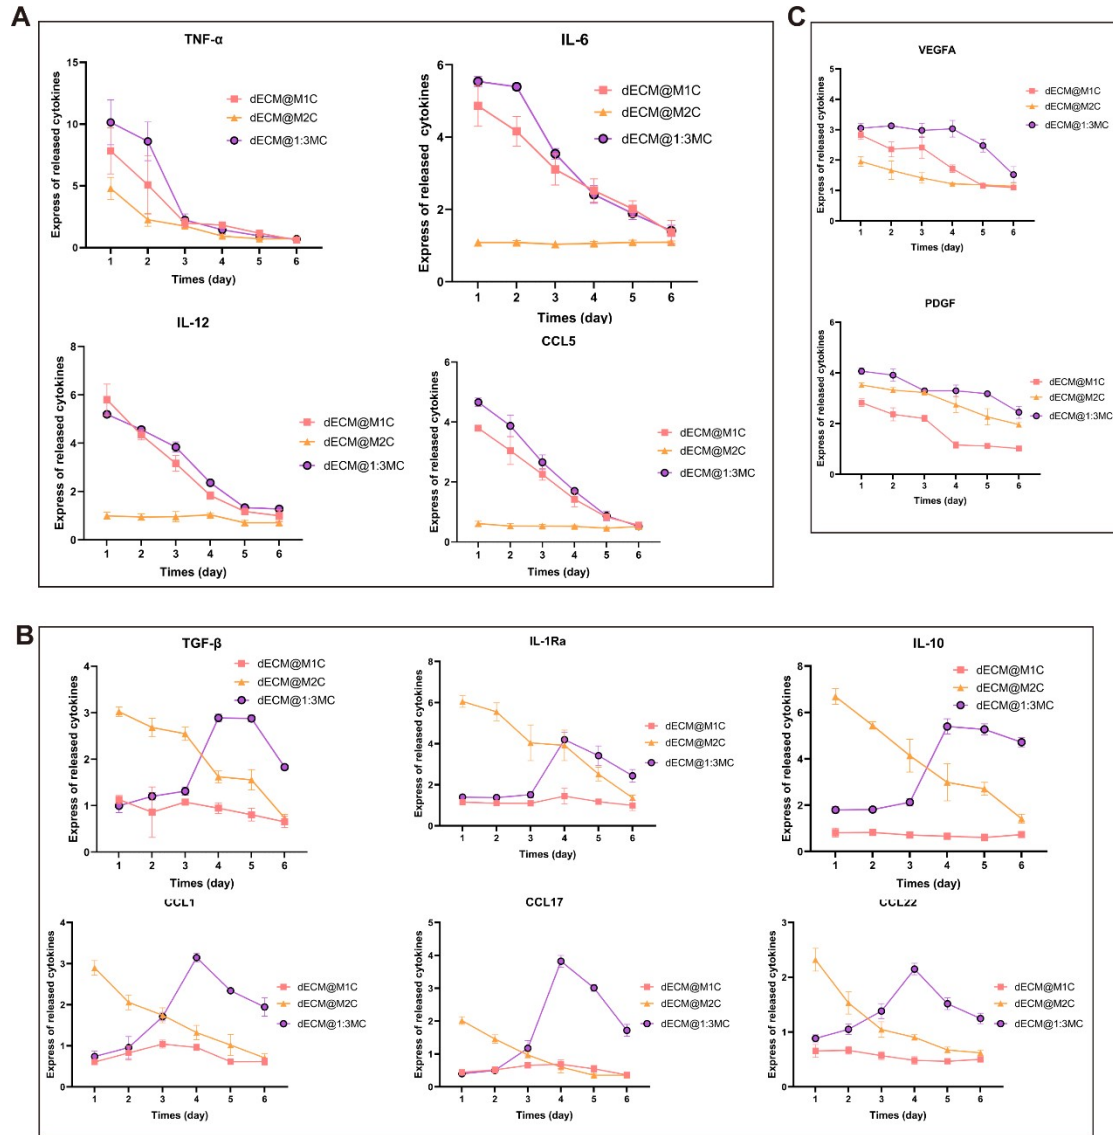

**Figure S3. Dynamical expressions of multiple macrophage-associated cytokines.** (A) Analysis of M1 phenotype related cytokines. n = 3. (B) Analysis of M2 phenotype related cytokines. n = 3. (C) Analysis of M1 and M2 phenotype common related cytokines. n = 3.

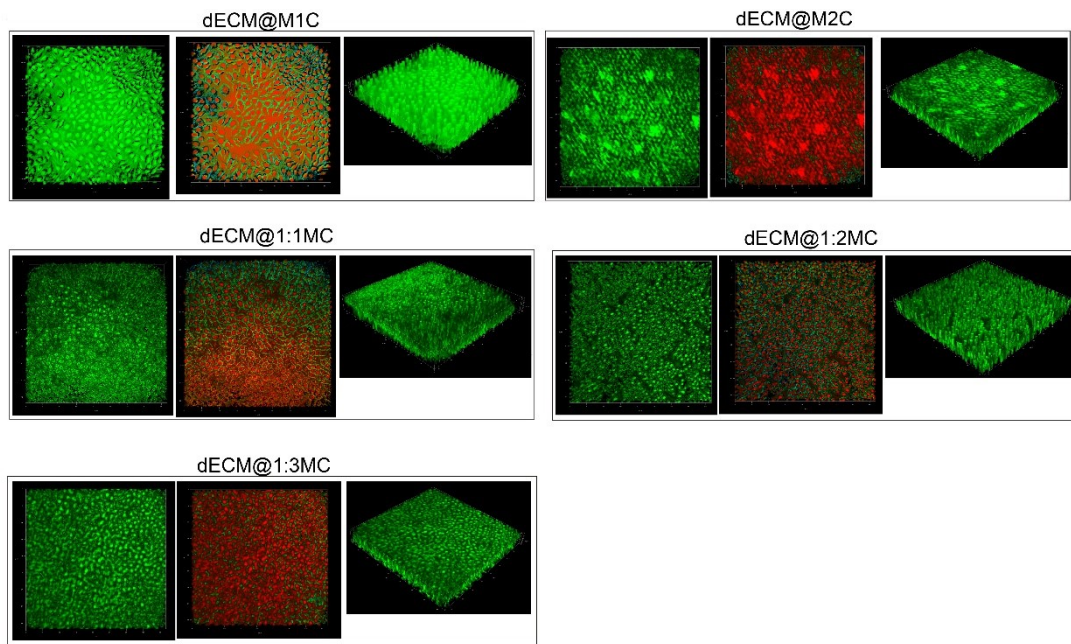

**Figure S4.** Effect of dECM@MC on fibroblast 3D morphological changes. 3D-fluorescence images were constructed from Z-stack images using the LAS X 3D image analysis software.

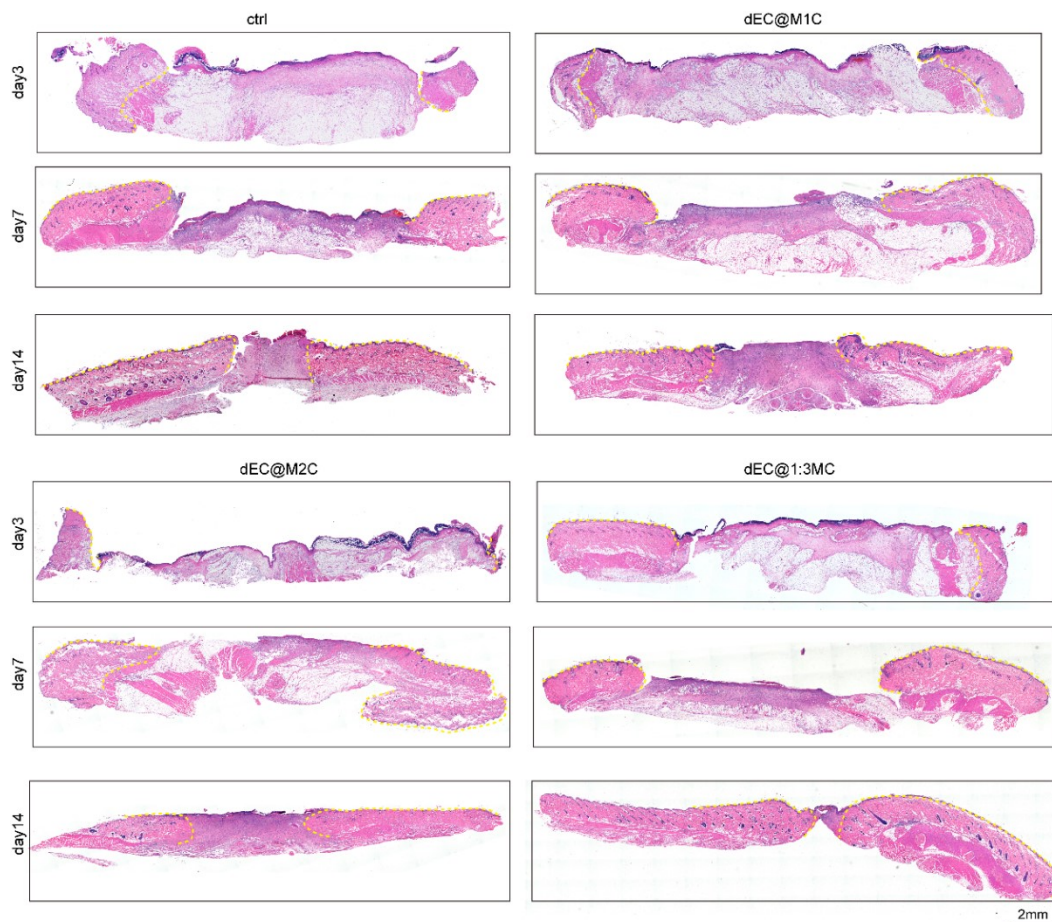

**Figure S5.** H&E staining of the edge of wounds at day 3, 7 and 14. Scale bars, 2 mm.

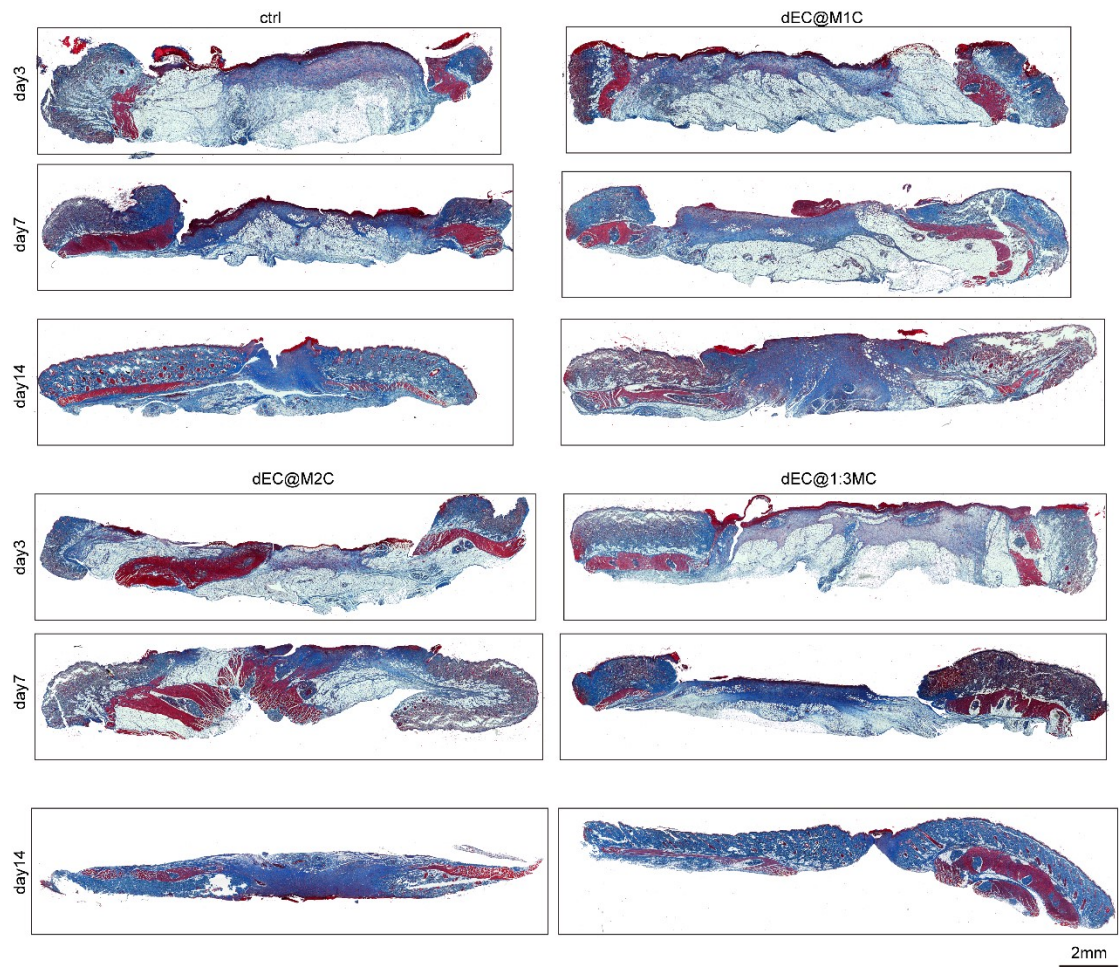

**Figure S6.** Masson's trichrome staining of the edge of wounds at day 3, 7 and 14. Scale bars, 2 mm.
